WITHDRAWN ARTICLE

## WITHDRAWN: MiR-760 inhibits the progression of non-small cell lung cancer through blocking ROS1/Ras/Raf/MEK/ERK pathway

*Wei Wang, Bin He*

Bioscience Reports (2020), BSR20182483; DOI: 10.1042/BSR20182483

The Accepted Manuscript version of this article (published on 29 April 2020) was withdrawn on 8 June 2020 due to concerns over authorship and data validity.
